# Supplementary material for: Effect of Neoadjuvant Therapies on Soft Tissue Sarcomas with Tail-like Lesions: A Multicenter Retrospective Study
Source: MDPI journal article supplement (doi:10.3390/cancers13153901), 2021-08-02
Supplement: s1 [file s1]

## Supplementary Materials

### Effect of Neoadjuvant Therapies on Soft Tissue Sarcomas with Tail-Like Lesions: A Multicenter Retrospective Study

Hisaki Aiba, Kunihiro Ikuta, Kunihiro Asanuma, Katsuhisa Kawanami, Satoshi Tsukushi, Akihiko Matsumine, Daisuke Ishimura, Akihito Nagano, Yoji Shido, Eiji Kozawa, Kenji Yamada, Junji Wasa, Hiroaki Kimura, Takao Sakai, Hideki Murakami, Tomohisa Sakai, Tomoki Nakamura and Yoshihiro Nishida

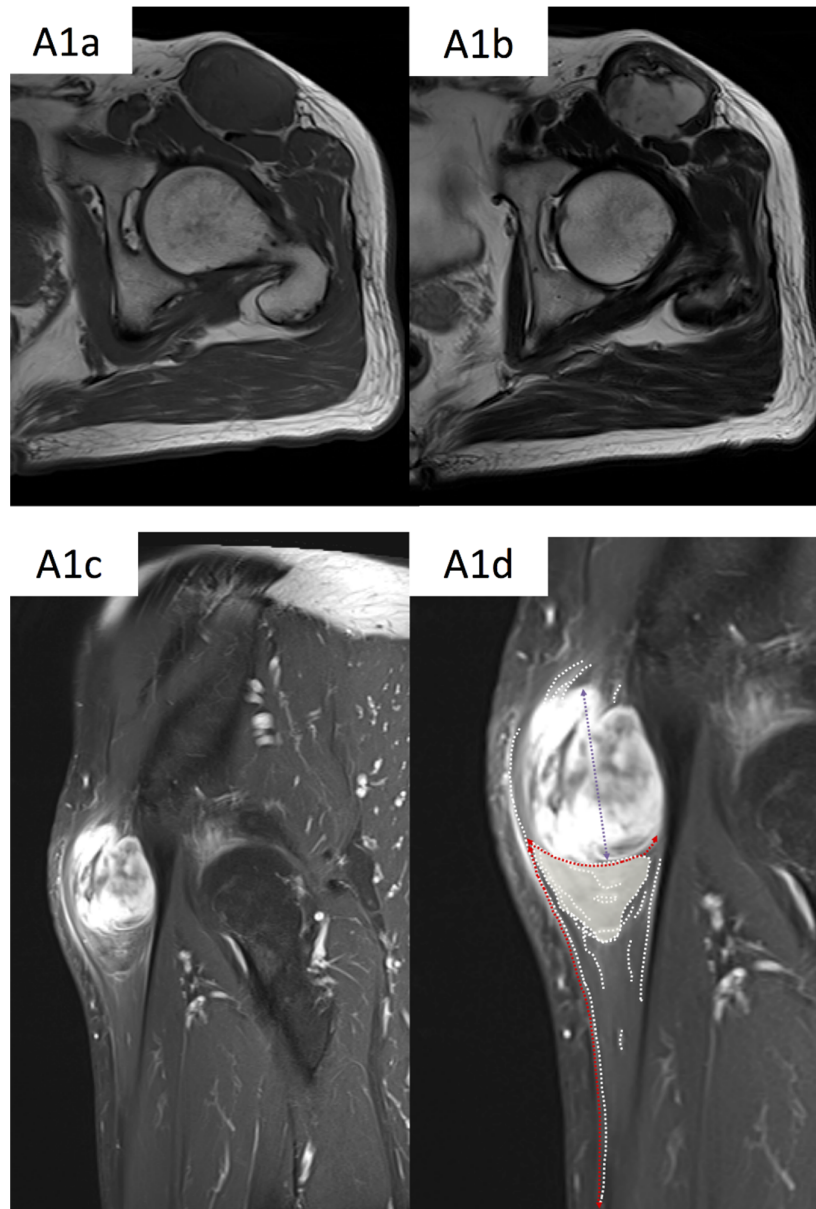

**Figure S1.** Representative case and the method of measuring the tail-like lesion (deeply located lesion, 65-year-old, male, myxofibrosarcoma, sartorius muscle).

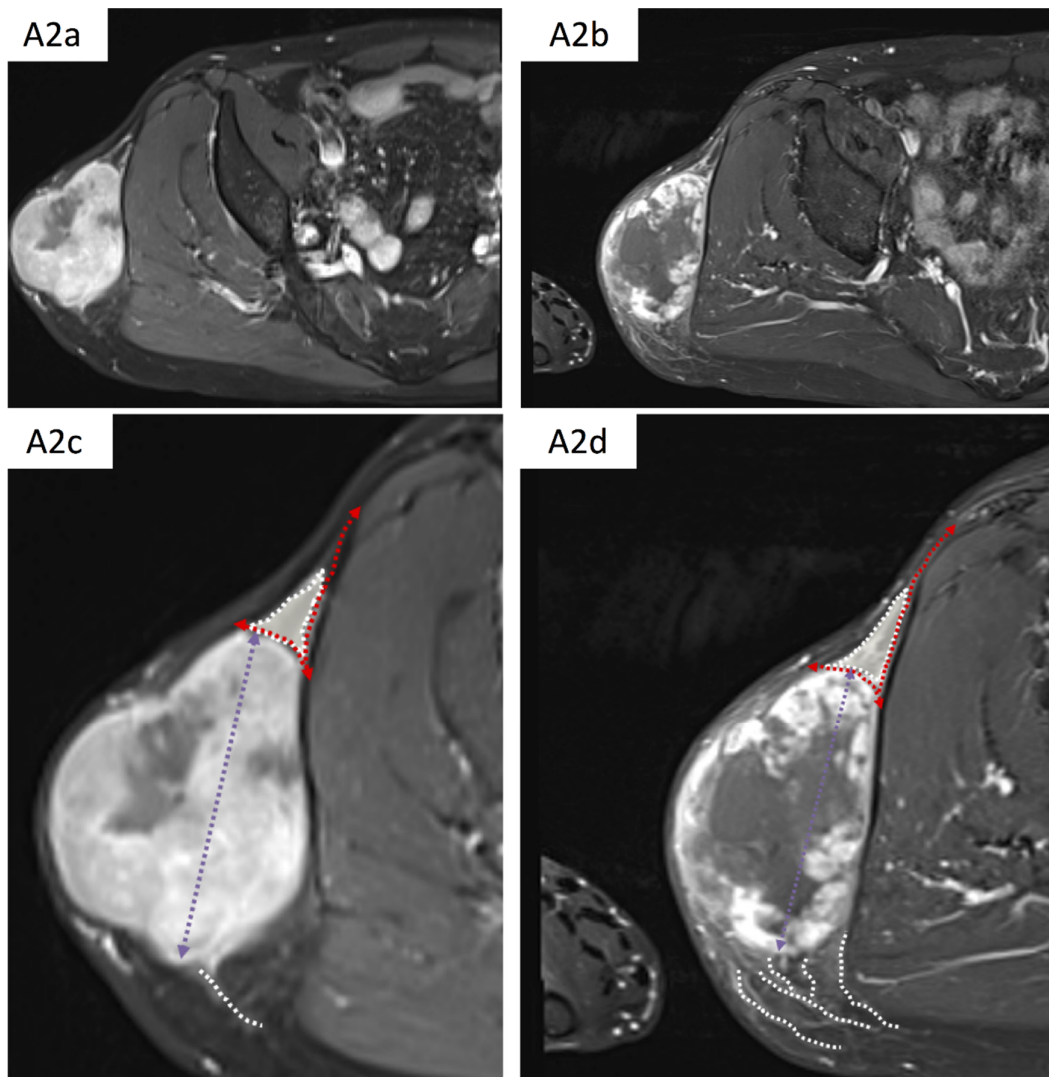

**Figure 2.** Representative case and the method of measuring the tail-like lesion (superficially located lesion, 59-year-old, male, undifferentiated pleomorphic sarcoma, buttocks).

**Table S1.** Univariate and multivariate analyses of response to neoadjuvant therapy.

| Characteristics (N = 36). |                 | PR (/n) | Univariate <sup>1</sup> | Multivariate <sup>2</sup> |
|---------------------------|-----------------|---------|-------------------------|---------------------------|
| Histology                 | UPS             | 1 (/11) | p = 0.21                | p = 0.54                  |
|                           | MFS             | 3 (/13) |                         |                           |
|                           | SS              | 0 (/4)  |                         |                           |
|                           | DDL             | 2 (/4)  |                         |                           |
|                           | Others          | 2 (/4)  |                         |                           |
| Length                    | <5 cm           | 1 (/7)  | p = 0.78                | NA                        |
|                           | 5–10 cm         | 5 (/20) |                         |                           |
|                           | >10 cm          | 2 (/8)  |                         |                           |
| Location                  | Lower extremity | 5 (/30) | p = 0.03                | p = 0.26 <sup>3</sup>     |
|                           | Upper extremity | 0 (/3)  |                         |                           |
|                           | Trunk           | 3 (/3)  |                         |                           |
| Sex                       | Male            | 4 (/21) | p = 0.56                | NA                        |
|                           | Female          | 4 (/15) |                         |                           |
| Lesion status             | Primary         | 7 (/33) | p = 0.63                | NA                        |
|                           | Recurrence      | 1 (/3)  |                         |                           |
| FNCLCC grade              | Grade 2         | 1 (/4)  | p = 0.89                | NA                        |
|                           | Grade 3         | 7 (/32) |                         |                           |
| Biopsy method             | Needle          | 3 (/14) | p = 0.93                | NA                        |
|                           | Open            | 5 (/22) |                         |                           |
| Depth                     | Superficial     | 2 (/13) | p = 0.46                | NA                        |
|                           | Deep            | 6 (/23) |                         |                           |
| Neoadjuvant therapy       | RT              | 0 (/3)  | p = 0.56                | NA                        |
|                           | Cx              | 6 (/19) |                         |                           |
|                           | RT + Cx         | 2 (/14) |                         |                           |

<sup>1</sup> Chi-squared analysis; <sup>2</sup> multiple logistic regression analysis; <sup>3</sup> analyzed using dummy variables to differentiate between patients with and without lower extremity location. UPS, undifferentiated pleomorphic sarcoma; MFS, myxofibrosarcoma; SS, synovial sarcoma; DDL, de-differentiated liposarcoma; FNCLCC, French Federation of Cancer Centers; RT, radiotherapy; Cx, chemotherapy; NA, not analyzed.

**Table S2.** Univariate and multivariate analyses of the disappearance of tail-like lesions.

| Characteristics (N = 36) |                 | Disappearance of tail-like lesion (/n) | Univariate <sup>1</sup> | Multivariate <sup>2</sup> |
|--------------------------|-----------------|----------------------------------------|-------------------------|---------------------------|
| Histology                | UPS             | 2 (/11)                                | p = 0.32                | NA                        |
|                          | MFS             | 5 (/13)                                |                         |                           |
|                          | SS              | 1 (/4)                                 |                         |                           |
|                          | DDL             | 1 (/4)                                 |                         |                           |
|                          | Others          | 1 (/4)                                 |                         |                           |
| Length                   | <5 cm           | 1 (/7)                                 | p = 0.36                | NA                        |
|                          | 5–10 cm         | 8 (/20)                                |                         |                           |
|                          | >10 cm          | 3 (/8)                                 |                         |                           |
| Location                 | Lower extremity | 8 (/30)                                | p = 0.04                | p = 0.06 <sup>3</sup>     |
|                          | Upper extremity | 1 (/3)                                 |                         |                           |
|                          | Trunk           | 3 (/3)                                 |                         |                           |
| Sex                      | Male            | 8 (/21)                                | p = 0.56                | NA                        |
|                          | Female          | 4 (/15)                                |                         |                           |
| Lesion status            | Primary         | 12 (/33)                               | p = 0.20                | p = 0.20                  |
|                          | Recurrence      | 0 (/3)                                 |                         |                           |
| FNCLCC grade             | Grade 2         | 1 (/4)                                 | p = 0.71                | NA                        |
|                          | Grade 3         | 11 (/32)                               |                         |                           |
| Biopsy method            | Needle          | 5 (/14)                                | p = 0.81                | NA                        |
|                          | Open            | 7 (/22)                                |                         |                           |
| Depth                    | Superficial     | 3 (/13)                                | p = 0.33                | NA                        |
|                          | Deep            | 9 (/23)                                |                         |                           |
| Neoadjuvant therapy      | RT              | 0 (/3)                                 | p = 0.32                | NA                        |
|                          | Cx              | 8 (/19)                                |                         |                           |
|                          | RT + Cx         | 4 (/14)                                |                         |                           |

<sup>1</sup> Chi-squared test; <sup>2</sup> multiple logistic regression analysis; <sup>3</sup> analyzed using dummy variables to differentiate between patients with and without lower extremity location. UPS, undifferentiated pleomorphic sarcoma; MFS, myxofibrosarcoma; SS, synovial sarcoma; DDL, dedifferentiated liposarcoma; FNCLCC, French Federation of Cancer Centers; RT, radiotherapy; Cx, chemotherapy; NA, not analyzed.

**Table S3.** Univariate and multivariate analyses of achievement of R0 resection.

| Characteristics (N = 36)          |                 | R0 resection (/n) | Univariate <sup>1</sup> | Multivariate <sup>2</sup> |
|-----------------------------------|-----------------|-------------------|-------------------------|---------------------------|
| Histology                         | UPS             | 7 (/11)           | p = 0.20                | p = 0.40                  |
|                                   | MFS             | 8 (/13)           |                         |                           |
|                                   | SS              | 4 (/4)            |                         |                           |
|                                   | DDL             | 4 (/4)            |                         |                           |
|                                   | Others          | 4 (/4)            |                         |                           |
| Length                            | <5 cm           | 5 (/8)            | p = 0.63                | NA                        |
|                                   | 5–10 cm         | 4 (/20)           |                         |                           |
|                                   | >10 cm          | 2 (/8)            |                         |                           |
| Location                          | Lower extremity | 23(/30)           | p = 0.15                | p = 0.16 <sup>3</sup>     |
|                                   | Upper extremity | 1 (/3)            |                         |                           |
|                                   | Trunk           | 3 (/3)            |                         |                           |
| Sex                               | Male            | 14 (/21)          | p = 0.56                | NA                        |
|                                   | Female          | 13 (/15)          |                         |                           |
| Lesion status                     | Primary         | 25(/33)           | p = 0.73                | NA                        |
|                                   | Recurrence      | 2 (/3)            |                         |                           |
| FNCLCC grade                      | Grade 2         | 2 (/4)            | p = 0.22                | p = 0.57                  |
|                                   | Grade 3         | 25 (/32)          |                         |                           |
| Biopsy method                     | Needle          | 10 (/14)          | p = 0.69                | NA                        |
|                                   | Open            | 17 (/22)          |                         |                           |
| Depth                             | Superficial     | 9 (/13)           | p = 0.55                | NA                        |
|                                   | Deep            | 18 (/23)          |                         |                           |
| Neoadjuvant therapy               | RT              | 2 (/3)            | p = 0.01                | p = 0.06 <sup>4</sup>     |
|                                   | Cx              | 18 (/19)          |                         |                           |
|                                   | RT + Cx         | 7 (/14)           |                         |                           |
| Histological response             | G1              | 11 (/15)          | p = 0.63                | NA                        |
|                                   | G2              | 9 (/13)           |                         |                           |
|                                   | G3+4            | 7 (/8)            |                         |                           |
| RECIST1.1                         | SD + PD         | 19 (/28)          | p = 0.06                | p = 0.09                  |
|                                   | PR              | 8 (/8)            |                         |                           |
| Disappearance of tail-like lesion | Yes             | 9 (/12)           | p = 1.0                 | NA                        |
|                                   | No              | 18 (/24)          |                         |                           |
| Skin reconstruction               | Yes             | 9 (/14)           | p = 0.24                | p = 0.26                  |
|                                   | No              | 18 (/22)          |                         |                           |
| Prosthesis use                    | Yes             | 2 (/2)            | p = 0.40                | NA                        |
|                                   | No              | 25 (/34)          |                         |                           |
| Manipulation of major AVN         | Yes             | 15 (/22)          | p = 0.24                | p = 0.13                  |
|                                   | No              | 12 (/14)          |                         |                           |

<sup>1</sup> Chi-squared test; <sup>2</sup> multiple logistic regression analysis; <sup>3</sup> analyzed using dummy variables to differentiate between patients with or without lower extremity location. <sup>4</sup> analyzed using dummy variables to differentiate between patients with and without chemoradiotherapy. UPS, undifferentiated pleomorphic sarcoma; MFS, myxofibrosarcoma; SS, synovial sarcoma; DDL, dedifferentiated liposarcoma; FNCLCC, French Federation of Cancer Centers; RT, radiotherapy; Cx, chemotherapy; SD, stable disease; PD, progressive disease; PR, partial response; NA, not analyzed.

Table S4. Univariate analysis of oncologic outcomes.

| Characteristics (N = 36)                     |       | Univariate <sup>1</sup>   | P-value   |
|----------------------------------------------|-------|---------------------------|-----------|
| Sex (male > female)                          | OS    | HR = 0.50, 0.12–2.0       | p = 0.332 |
|                                              | L-RFS | HR = 1.03, 0.09–11.49     | p = 0.978 |
|                                              | D-RFS | HR = 0.49, 0.16–1.48      | p = 0.208 |
| FNCLCC grade (grade 2 > 3)                   | OS    | HR = 0.96, 0.12–7.84      | p = 0.971 |
|                                              | L-RFS | HR = 0.04, not calculated | p = 0.667 |
|                                              | D-RFS | HR = 0.76, 0.17–3.49      | p = 0.743 |
| Depth (superficial > deep)                   | OS    | HR = 0.84, 0.20–3.55      | p = 0.813 |
|                                              | L-RFS | HR = 0.69, 0.06–7.63      | p = 0.761 |
|                                              | D-RFS | HR = 1.02, 0.07–1.52      | p = 0.970 |
| Histological response(grade 3+4 > 1+2)       | OS    | HR = 0.03, 0.00–32.70     | p = 0.331 |
|                                              | L-RFS | HR = 0.02, 0.00–240.53    | p = 0.413 |
|                                              | D-RFS | HR = 0.23, 0.03–1.75      | p = 0.153 |
| RECIST 1.1 (PR > SD + PD)                    | OS    | HR = 0.38, 0.12–1.23      | p = 0.106 |
|                                              | L-RFS | HR = 0.55, 0.05–6.13      | p = 0.627 |
|                                              | D-RFS | HR = 0.03, 0.08–6.11      | p = 0.198 |
| Disappearance of tail-like lesion (yes > no) | OS    | HR = 0.64, 0.13–3.20      | p = 0.590 |
|                                              | L-RFS | HR = 1.01, 0.09–11.22     | p = 0.992 |
|                                              | D-RFS | HR = 0.34, 0.07–1.52      | p = 0.158 |
| Margin status (R0 > R1)                      | OS    | HR = 0.69, 0.16–2.97      | p = 0.624 |
|                                              | L-RFS | HR = 0.79, 0.07–8.78      | p = 0.847 |
|                                              | D-RFS | HR = 1.24, 0.34–4.51      | p = 0.743 |

<sup>1</sup> Log-rank analysis. Although multiple logistic regression analysis was performed, there were no statistically significant differences. The range indicates the 95% confidence interval of the hazard ratio. HR, hazard ratio; OS, overall survival; L-RFS, local relapse-free survival; D-RFS, distant relapse-free survival; FNCLCC, French Federation of Cancer Centers; SD, stable disease; PD, progressive disease; PR, partial response.

**Table S5.** Basic characteristics of the patients with or without neoadjuvant therapy.

| Characteristics                            |                 | With Neoadjuvant Therapy (n = 24) | Without Neoadjuvant Therapy (n = 24) | P-value                |
|--------------------------------------------|-----------------|-----------------------------------|--------------------------------------|------------------------|
| Histology                                  | UPS             | 11                                | 8                                    | p = 0.376 <sup>1</sup> |
|                                            | MFS             | 13                                | 16                                   |                        |
| Neoadjuvant therapy                        | RT              | 3                                 | 0                                    | NA                     |
|                                            | Cx              | 8                                 |                                      |                        |
|                                            | RT + Cx         | 13                                |                                      |                        |
| Age at diagnosis (mean, SD)                |                 | 61.8, 10.5                        | 70.8, 14.0                           | p = 0.014 <sup>2</sup> |
| Tumor length (median, IQR)                 |                 | 76.0, 37.5-113.3                  | 48.0, 34.0-78.0                      | p = 0.071 <sup>2</sup> |
| Tail-like lesion's length (median, IQR)    |                 | 30.0, 24.5-48.3                   | 21.5, 18.0-35.0                      | p = 0.014 <sup>2</sup> |
| Tail-like lesion's thickness (median, IQR) |                 | 6.5, 2.2-8.8                      | 4.0, 4.0-11.5                        | p = 0.076 <sup>2</sup> |
| Location                                   | Lower extremity | 20                                | 11                                   | p = 0.024 <sup>1</sup> |
|                                            | Upper extremity | 2                                 | 8                                    |                        |
|                                            | Trunk           | 2                                 | 5                                    |                        |
| Sex                                        | Male            | 16                                | 14                                   | p = 0.551 <sup>1</sup> |
|                                            | Female          | 8                                 | 10                                   |                        |
| Lesion status                              | Primary         | 22                                | 22                                   | p = 1.0 <sup>1</sup>   |
|                                            | Recurrence      | 2                                 | 2                                    |                        |
| FNCLCC grade                               | Grade 1         | 0                                 | 7                                    | p = 0.015 <sup>1</sup> |
|                                            | Grade 2         | 4                                 | 2                                    |                        |
|                                            | Grade 3         | 20                                | 15                                   |                        |
| Biopsy method                              | Needle          | 12                                | 15                                   | p = 0.344 <sup>1</sup> |
|                                            | Open            | 12                                | 9                                    |                        |
| Depth                                      | Superficial     | 9                                 | 15                                   | p = 0.083 <sup>1</sup> |
|                                            | Deep            | 15                                | 9                                    |                        |
| Surgical margin                            | R0              | 15                                | 14                                   | p = 0.768 <sup>1</sup> |
|                                            | R1              | 9                                 | 10                                   |                        |
| Adjuvant therapy                           | Yes             | 3                                 | 12                                   | p = 0.005              |
|                                            | No              | 21                                | 12                                   |                        |

<sup>1</sup> Chi-squared test; <sup>2</sup> Mann-Whitney U test. UPS, undifferentiated pleomorphic sarcoma; MFS, myxofibrosarcoma; SD, standard deviation; IQR, interquartile range; FNCLCC, French Federation of Cancer Centers; RT, radiotherapy; Cx, chemotherapy; NA, not analyzed.
